# Supplementary material
Source: PubMed Central journal article supplement (PMC10528242)
Supplement: NIHMS1919932-supplement-2.pdf [file NIHMS1919932-supplement-2.pdf]

Supplemental Table 2: Distribution of race and ethnicity by adverse social determinants of health (SDoH) quartile.

|                    | Quartile 1                        | Quartile 2                        | Quartile 3                        | Quartile 4                        |
|--------------------|-----------------------------------|-----------------------------------|-----------------------------------|-----------------------------------|
|                    | Weighted N<br>Unweighted N<br>(%) | Weighted N<br>Unweighted N<br>(%) | Weighted N<br>Unweighted N<br>(%) | Weighted N<br>Unweighted N<br>(%) |
| Non-Hispanic White | 7778873<br>5285<br>(75)           | 3749186<br>2968<br>(67)           | 3062650<br>2469<br>(54)           | 2299851<br>1744<br>(49)           |
| Non-Hispanic Black | 1193748<br>919<br>(12)            | 833711<br>818<br>(15)             | 1188422<br>1056<br>(21)           | 961118<br>914<br>(20)             |
| Non-Hispanic Asian | 498088<br>269<br>(5)              | 205654<br>143<br>(4)              | 160852<br>119<br>(3)              | 60987<br>54<br>(1)                |
| Hispanic           | 888121<br>552<br>(9)              | 840630<br>619<br>(15)             | 1304745<br>970<br>(23)            | 1414513<br>1040<br>(30)           |
