# Supplementary material
Source: PubMed Central journal article supplement (PMC10528242)
Supplement: NIHMS1919932-supplement-3.pdf [file NIHMS1919932-supplement-3.pdf]

Supplemental Table 5. The association of adverse social determinants of health (SDoH) quartile with eye care utilization in the overall model among patients with Type 1 and Type 2 diabetes.

| <i>Diabetes Type</i> | <i>SDoH quartile</i> | No eye care utilization | Eye care utilization | Adjusted *        |         |
|----------------------|----------------------|-------------------------|----------------------|-------------------|---------|
|                      |                      | N (weighted %)          | N (weighted %)       | OR (95% CI)       | p value |
| Type 1 Diabetes      | Q1                   | 69 (25)                 | 164 (46)             | Reference         |         |
|                      | Q2                   | 55 (21)                 | 77 (19)              | 0.47 (0.25, 0.87) | <0.05   |
|                      | Q3                   | 67 (23)                 | 82 (19)              | 0.48 (0.26, 0.89) | <0.05   |
|                      | Q4                   | 76 (31)                 | 70 (16)              | 0.31 (0.16, 0.61) | <0.01   |
|                      | <i>p for trend</i>   |                         |                      |                   | <0.01   |
| Type 2 Diabetes      | Q1                   | 608 (34)                | 1495 (46)            | Reference         |         |
|                      | Q2                   | 394 (20)                | 774 (21)             | 0.71 (0.58, 0.86) | <0.001  |
|                      | Q3                   | 466 (24)                | 669 (20)             | 0.60 (0.49, 0.73) | <0.001  |
|                      | Q4                   | 394 (22)                | 439 (13)             | 0.43 (0.34, 0.53) | <0.001  |
|                      | <i>p for trend</i>   |                         |                      |                   | <0.001  |

Abbreviations: OR = odds ratio; CI = confidence interval

\*Overall model is adjusted by age, sex, geographic region, race/ethnicity, Charlson Comorbidity Index, year of the survey, and vision impairment
