# Supplementary material
Source: PubMed Central journal article supplement (PMC10528242)
Supplement: NIHMS1919932-supplement-4.pdf [file NIHMS1919932-supplement-4.pdf]

Supplemental Table 6: The association of aggregate adverse social determinants of health (SDoH) score with eye care utilization in the sensitivity analysis.

|                                     | Adjusted* OR<br>(95% CI) | P-value |
|-------------------------------------|--------------------------|---------|
| SDoH score                          | 0.92(0.91, 0.93)         | <0.001  |
| Race/Ethnicity <sup>δ</sup>         |                          |         |
| Non-Hispanic White                  | 1.19(1.07, 1.32)         | 0.002   |
| Non-Hispanic Black                  | 1.18(1.03, 1.35)         | 0.015   |
| Non-Hispanic Asian                  | 1.30(1.01, 1.67)         | 0.041   |
| SDoH score x Non-<br>Hispanic Asian | 0.90(0.85, 0.97)         | 0.003   |

Abbreviations: SDoH = social determinants of health; OR = odds ratio; CI = confidence interval

\* Adjusted by age, sex, race/ethnicity, geographic region, Charlson Comorbidity Index, year of the survey, and vision impairment.

<sup>δ</sup> The Hispanic group is omitted due to collinearity
